# Supplementary material for: Resina Draconis Particles Encapsulated in a Hyaluronic-Acid-Based Hydrogel to Treat Complex Burn Wounds
Source: MDPI journal article supplement (doi:10.3390/pharmaceutics14102087), 2022-09-29
Supplement: s1 [file s1]

## **Supplementary materials**

### **Resina Draconis Particles Encapsulated in a Hyaluronic Acid Based Hydrogel to Treat Complex Burn Wounds**

*Lijun Xu, Ziqiang Zhou, Yuying Chen, Huangjie Lu, Ping Hu\**

College of Pharmacy, Jinan University, Guangzhou 511436, Guangdong, P. R. China

Corresponding author: Ping Hu

Mailing address: Jinan University, No.855, East Xingye Avenue, Panyu District,  
Guangzhou 511436, CHINA

Tel.: +86-18581483142

E-mail: [inzahu@hotmail.com](mailto:inzahu@hotmail.com), [pinghu@jnu.edu.cn](mailto:pinghu@jnu.edu.cn)

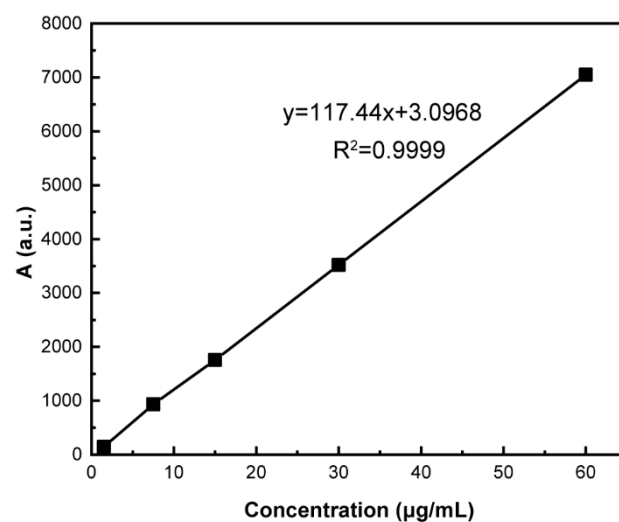

**Figure S1:** Standard Curve of Loureirin A.

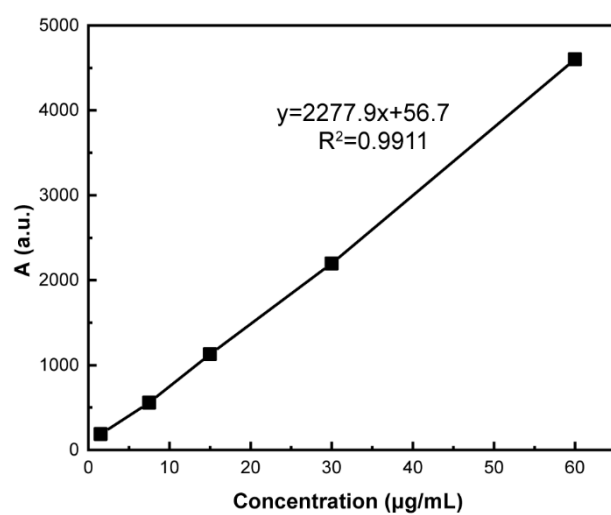

**Figure S2:** Standard Curve of Loureirin B.

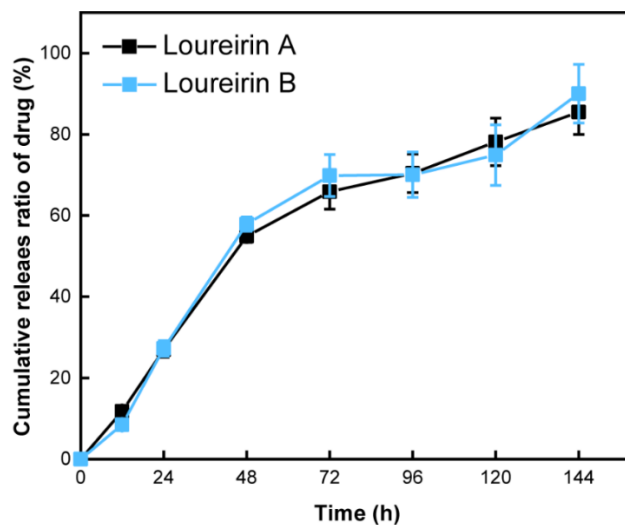

**Figure S3:** Release of LoureirinA and Loureirin B from the Resina Draconis particles *in vitro*.

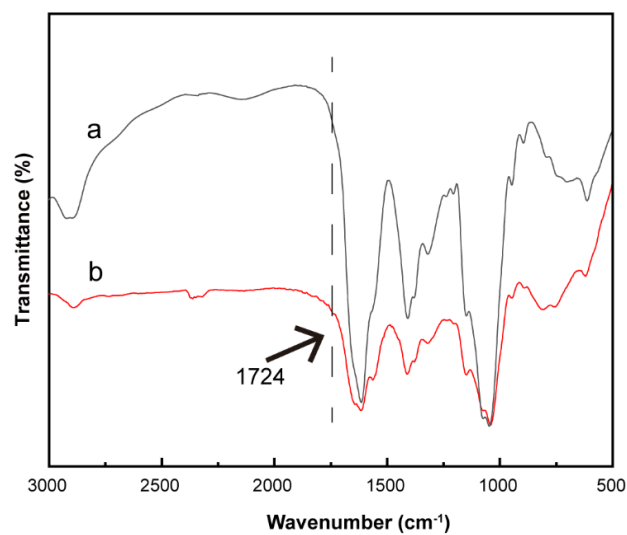

**Figure S4:** FT-IR spectra of (a) HA, (b) OHA.

**Figure S5:**  $^1\text{H}$ -NMR spectra of CMCS.

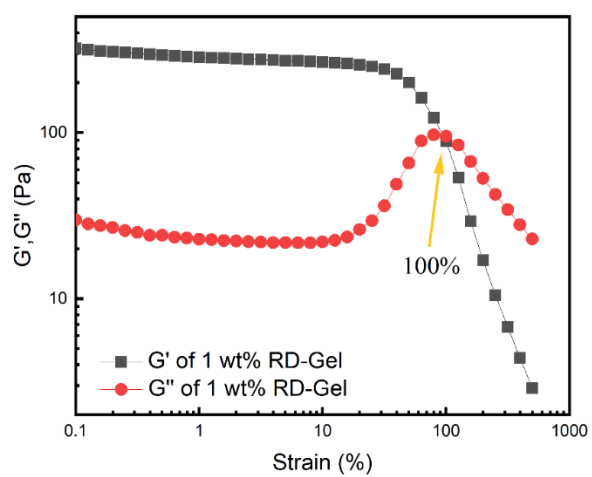

**Figure S5:**  $G'$  and  $G''$  of the hydrogel on strain sweep of 1 wt% RD-Gel.
